# Supplementary material
Source: Springer Nature journal article supplement (https://www.springermedizin.de/resource/supplementary/12913_2013_3004_MOESM1_ESM.pdf/9533292)
Supplement: MOESM1 [file 9533292]

**“Locally  
institutionalized  
system”**

**“De-  
institutionalized  
system”**

**Central Mental Hospital**  
Acute, intermediate and rehabilitation  
units, security ward

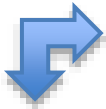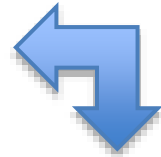

**District Psychiatric  
Centre**

Outpatient clinics: 1

Inpatient unit: 3  
(20 psychiatric beds)

Day-hospitals: 0

**District Psychiatric  
Centre**

Outpatient clinics: 2

Inpatient units: 0  
(maximum of 6 somatic  
beds available at local  
hospital)

Day-hospital units: 2
